# Supplementary material for: Four Escherichia coli O157:H7 Phages: A New Bacteriophage Genus and Taxonomic Classification of T1-Like Phages
Source: PLoS One. 2014 Jun 25;9(6):e100426. doi: 10.1371/journal.pone.0100426 (PMC4070988; doi:10.1371/journal.pone.0100426)
Supplement: Table S2 — Feature of phage AHS24 gene products and their functional assignments. (XLSX) [file pone.0100426.s002.xlsx]

## Sheet: Sheet1
Table S2 Feature of phage AHS24 gene products and their functional assignments.
ORF	Strand	Start-stop	Size (aa)	Function	Best BLASTP Hits (Homologues)
1	+	1−516	171	terminase, small subunit	terminase small subunit (phage vB_EcoS_Rogue1, AFM76567.1)
2	+	562−1077	171	HNH endonuclease	endonuclease ofthe HNH family (Xanthomonas phage Xp10, NP_858964.1); putative homing endonuclease RB16 4(phage RB16, YP_003858386.1); putativeHNH endonuclease (phage Wv8, YP_002922896.1)
3	+	1070−2641	523	terminase, large subunit	terminase large subunit (phage vB_EcoS_Rogue1, AFM76568.1)
4	+	2691−3965	424	portal protein	putative portal protein (phage vB_EcoS_Rogue1, AFM76569.1)
5	+	3946−4689	247	head morphogenesis protein	head morphogenesis protein (phage vB_EcoS_Rogue1, AFM76570.1)
6	+	4691−5800	369	prohead protease	hypothetical protein JK_31 (phage JK06, YP_277469.1)
7	+	5803−6297	164	hypothetical protein	hypothetical protein rtp26 (phage RTP, YP_398970.1)
8	+	6392−6844	150	hypothetical protein	hypothetical protein Rogue1_0021 (phage vB_EcoS_Rogue1, AFM76573.1)
9	+	6831−7277	148	hypothetical protein
10	+	7358−8302	314	major capsid protein	major capsid protein (phage vB_EcoS_Rogue1, AFM76574.1); hypothetical protein ACG-M12_0020 (phage vB_EcoS_ACG-M12, YP_006987838.1); hypothetical protein rtp27 (phage RTP, YP_398971.1)
11	+	8393−8641	82	hypothetical protein	hypothetical protein Rogue1_0024 (phagevB_EcoS_Rogue1, AFM76576.1)
12	+	8688−9089	133	hypothetical protein	hypothetical protein Rogue1_0025 (phage vB_EcoS_Rogue1, AFM76577.1)
13	+	9086−9454	122	hypothetical protein	hypothetical protein Rogue1_0026 (phage vB_EcoS_Rogue1, AFM76578.1)
14	+	9447−9875	142	hypothetical protein	hypothetical protein Rogue1_0027 (phage vB_EcoS_Rogue1, AFM76579.1)
15	+	9865−10263	132	minor tail protein	hypothetical protein Rogue1_0028 (phage vB_EcoS_Rogue1, AFM76580.1)
16	+	10278−10928	216	major tail protein	putative major tail protein (phage vB_EcoS_Rogue1, AFM76581.1)
17	+	11003−11317	104	hypothetical protein	hypothetical protein JK_16 (phage JK06, YP_277456.1)
18	+	11380−11634	84	hypothetical protein	hypothetical protein Rogue1_0031 (phage vB_EcoS_Rogue1, AFM76583.1)
19	+	11669−14722	1017	tail tape measure protein	tail tape measure protein (phage vB_EcoS_Rogue1, AFM76584.1)
20	+	14754−15104	116	minor tail protein	putative minortail protein (phagevB_EcoS_Rogue1, AFM76585.1)
21	+	15204−15398	64	hypothetical protein
22	+	15452−16219	255	minor tail protein	putative minor tail protein(phage vB_EcoS_Rogue1, AFM76587.1)
23	+	16230−16976	248	minor tail protein	putative minor tail protein(phage vB_EcoS_Rogue1, AFM76588.1)
24	+	16957−17523	188	tail assembly protein	putative tail assembly protein (phage vB_EcoS_Rogue1, AFM76589.1)
25	+	17604−20990	1128	tail fiber protein	putative tail fiber(phage vB_EcoS_Rogue1, AFM76590.1)
26	−	21021−21983	320	hypothetical protein	hypothetical protein Rogue1_0039 (phage vB_EcoS_Rogue1, AFM76591.1)
27	−	21983−22228	81	hypothetical lipoprotein	hypothetical protein Rogue1_0040 (phage vB_EcoS_Rogue1, AFM76592.1); putative phage lipoprotein (phage vB_EcoS_ACG-M12, YP_006987857.1)
28	+	22307−22513	68	hypothetical protein
29	+	22643−22801	52	hypothetical protein
30	+	22817−23446	209	regulatory protein	hypothetical protein Rogue1_0041 (phage vB_EcoS_Rogue1, AFM76593.1)
31	+	23520−23714	64	hypothetical protein	hypothetical protein Rogue1_0042 (phage vB_EcoS_Rogue1, AFM76594.1)
32	+	23718−24677	319	exodeoxyribonuclease VIII	putative exodeoxyribonuclease VIII (phage vB_EcoS_Rogue1, AFM76595.1)
33	+	24664−25137	157	HNH endonuclease	putative HNH endonuclease (phage RTP, YP_398984.1); putative HNH endonuclease (phage vB_EcoS_Rogue1, AFM76575.1)
34	+	25210−25860	216	recombination protein	putative recombination protein (phage vB_EcoS_Rogue1, AFM76596.)
35	+	25908−26330	140	single-stranded DNA binding protein Ssb	putative single-stranded DNA binding proteinSsb (phage vB_EcoS_Rogue1, AFM76597.1)
36	−	26362−29079	905	tail fiber	putative tail fiber (phage vB_EcoS_Rogue1, AFM76598.1)
37	−	29158−30081	307	DNA primase	putative DNA primase (phage vB_EcoS_Rogue1, AFM76599.1)
38	−	30134−30607	157	transcriptional regulator	putative transcriptional regulator (phage vB_EcoS_Rogue1, AFM76600.1)
39	+	30700−32643	647	ATP-dependent helicase	putative ATP-dependent helicase (phage vB_EcoS_Rogue1, AFM76601.1)
40	+	32643−33032	129	hypothetical protein	hypothetical protein Rogue1_0050 (phage vB_EcoS_Rogue1, AFM76602.1)
41	+	33091−33285	64	hypothetical protein	hypotheticalprotein Rogue1_0051 (phage vB_EcoS_Rogue1, AFM76603.1)
42	+	33285−33503	72	hypothetical protein	hypothetical protein Rogue1_0052 (phage vB_EcoS_Rogue1, AFM76604.1)
43	+	33500−33700	66	hypothetical protein	hypothetical protein Rogue1_0053 (phage vB_EcoS_Rogue1, AFM76605.1)
44	+	33775−33900	41	hypothetical protein	hypothetical protein Rogue1_0054 (phage vB_EcoS_Rogue1, AFM76606.1); hypothetical protein ACG-M12_0057 (phage vB_EcoS_ACG-M12, YP_006987876.1)
45	+	33897−34136	79	hypothetical protein	hypothetical protein Rogue1_0055 (phage vB_EcoS_Rogue1, AFM76607.1)
46	+	34133−34390	85	hypothetical protein	hypothetical protein Rogue1_0056 (phage vB_EcoS_Rogue1, AFM76608.1)
47	+	34419−34538	39	hypothetical protein
48	+	34542−35675	377	hypothetical protein	hypothetical protein Rogue1_0057 (phage vB_EcoS_Rogue1, AFM76609.1); hypothetical protein rtp61 (phage RTP, YP_399005.1); hypothetical protein ACG-M12_0060 (phage vB_EcoS_ACG-M12, YP_006987879.1)
49	+	35741−35938	65	hypothetical protein	hypothetical protein Rogue1_0058 (phage vB_EcoS_Rogue1, AFM76610.1)
50	+	36015−36200	61	hypothetical protein	hypothetical protein Rogue1_0059 (phage vB_EcoS_Rogue1, AFM76611.1)
51	+	36200−36388	62	hypothetical protein	hypothetical protein Rogue1_0060 (phage vB_EcoS_Rogue1, AFM76612.1)
52	+	36401−36574	57	hypothetical protein	hypothetical protein Rogue1_0061 (phage vB_EcoS_Rogue1, AFM76613.1); hypothetical protein rtp62 (phage RTP, YP_399006.1)
53	+	36690−36905	71	holin	putative holin (phage vB_EcoS_Rogue1, AFM76614.1)
54	+	36905−37387	160	endolysin	putative endolysin (phage vB_EcoS_Rogue1, AFM76615.1)
55	+	37369−37773	134	Rz1 protein	putative Rz1 protein (phage vB_EcoS_Rogue1, AFM76616.1)
56	−	37787−38122	111	hypothetical protein	hypothetical protein Rogue1_0065 (phage vB_EcoS_Rogue1, AFM76617.1)
57	−	38127−39710	527	hypothetical protein	hypotheticalprotein Rogue1_0066 (phage vB_EcoS_Rogue1, AFM76618.1)
58	−	39751−39930	59	hypothetical protein
59	−	40013−40138	41	hypothetical protein
60	−	40208−40417	69	hypothetical protein	hypothetical protein Rogue1_0068 (phage vB_EcoS_Rogue1, AFM76620.1)
61	−	40414−40767	117	hypothetical protein	hypothetical protein Rogue1_0069 (phage vB_EcoS_Rogue1, AFM76621.1)
62	−	40793−41095	100	hypothetical protein	hypothetical protein Rogue1_0070 (phage vB_EcoS_Rogue1, AFM76622.1)
63	−	41170−41322	50	hypothetical protein	hypothetical protein Rogue1_0071 (phage vB_EcoS_Rogue1, AFM76623.1)
64	−	41323−41562	79	hypothetical protein	hypothetical protein rtp73(phage RTP, YP_399017.1); hypotheticalprotein Rogue1_0072 (phage vB_EcoS_Rogue1, AFM76624.1)
65	−	41566−41682	38	hypothetical protein
66	−	41742−41936	64	hypothetical protein	hypothetical protein Rogue1_0074 (phage vB_EcoS_Rogue1, AFM76626.1)
67	+	41973−42092	39	hypothetical protein
68	+	42164−42286	40	hypothetical protein
69	+	42609−43124	171	hypothetical protein	gp74 (phage phiEB49, AEI91274.1) ; hypothetical protein rtp1 (phage RTP, YP_398945.1)
70	+	43124−43684	186	hypothetical protein	hypothetical protein JK_46(phage JK06, YP_277486.1)
71	+	43743−43976	77	hypothetical protein	hypothetical protein JK_44(phage JK06, YP_277484.1)
72	+	44015−44110	31	hypothetical protein	hypothetical protein Rogue1_006 (phage vB_EcoS_Rogue1, AFM76558.1)
73	+	44095−44211	38	hypothetical protein	hypothetical protein Rogue1_007 (phage vB_EcoS_Rogue1, AFM76559.1)
74	+	44215−44478	87	hypothetical protein	hypothetical protein JK_43(phage JK06, YP_277483.1)
75	+	44587−44715	42	hypothetical protein	hypothetical protein Rogue1_009 (phage vB_EcoS_Rogue1, AFM76561.1)
76	+	44712−45005	97	hypothetical protein	hypotheticalprotein Rogue1_0010 (phage vB_EcoS_Rogue1, AFM76562.1)
77	+	45009−45143	44	hypothetical protein	putative fusion protein (phage vB_EcoS_Rogue1, AFM76563.1)
78	+	45146−45385	79	putative fusion protein	putative fusion protein (phage vB_EcoS_Rogue1, AFM76563.1); gp63 (phagephiEB49, AEI91263.1)
79	+	45378−45572	64	hypothetical protein	hypothetical protein Rogue1_0012 (phage vB_EcoS_Rogue1, AFM76564.1)
80	+	45966−46163	65	hypothetical protein	gp62 (phage phiEB49, AEI91262.1); hypothetical protein rtp16 (phage RTP, YP_398960.1)
81	+	46192−46341	49	hypothetical protein	hypothetical protein Rogue1_0014 (phage vB_EcoS_Rogue1, AFM76566.1)
