# Supplementary material for: Four Escherichia coli O157:H7 Phages: A New Bacteriophage Genus and Taxonomic Classification of T1-Like Phages
Source: PLoS One. 2014 Jun 25;9(6):e100426. doi: 10.1371/journal.pone.0100426 (PMC4070988; doi:10.1371/journal.pone.0100426)
Supplement: Table S3 — Feature of phage AHP42 gene products and their functional assignments. (XLSX) [file pone.0100426.s003.xlsx]

## Sheet: Sheet1
Table S3 Feature of phage AHP42 gene products and their functional assignments.
ORF	Strand	Start-stop	Size (aa)	Function	Best BLASTP Hits (Homologues)
1	+	1−516	171	terminase, small subunit	terminase small subunit (phage vB_EcoS_Rogue1, AFM76567.1)
2	+	562−1077	171	HNH endonuclease	endonuclease of the HNH family (Xanthomonas phage Xp10, NP_858964.1); homing endonuclease RB16 4 (phage RB16, YP_003858386.1); HNH endonuclease (phage Wv8, YP_002922896.1)
3	+	1334−2641	435	terminase, large subunit	terminase largesubunit (phage vB_EcoS_Rogue1, AFM76568.1)
4	+	2691−3965	424	portal protein	putative portalprotein (phage vB_EcoS_Rogue1, AFM76569.1)
5	+	3946−4689	247	Phage head morphogenesis protein	head morphogenesis protein ( phage vB_EcoS_Rogue1, AFM76570.1)
6	+	4691−5800	369	prohead protease	hypothetical protein JK_31 (phage JK06, YP_277469.1)
7	+	5803−6297	164	hypothetical protein	hypothetical protein rtp26 (phage RTP, YP_398970.1)
8	+	6392−6865	157	hypothetical protein	hypothetical protein JK_26P (phage JK06, YP_277466.1)
9	+	6902−7276	124	hypothetical protein
10	+	7357−8301	314	major capsid protein	major capsid protein (phage vB_EcoS_Rogue1, AFM76574.1); hypothetical protein ACG-M12_0020 (phage vB_EcoS_ACG-M12, YP_006987838.1); hypothetical protein rtp27 (phage RTP, YP_398971.1);
11	+	8392−8640	82	hypothetical protein	hypothetical protein Rogue1_0024 (hage vB_EcoS_Rogue1, AFM76576.1)
12	+	8687−9088	133	hypothetical protein	hypothetical protein Rogue1_0025 (phage vB_EcoS_Rogue1, AFM76577.1)
13	+	9085−9453	122	hypothetical protein	hypothetical protein Rogue1_0026 (phage vB_EcoS_Rogue1, AFM76578.1)
14	+	9446−9847	142	hypothetical protein	hypothetical protein Rogue1_0027 (phage vB_EcoS_Rogue1, AFM76579.1)
15	+	9864−10262	132	hypothetical protein	hypothetical protein Rogue1_0028 (phage vB_EcoS_Rogue1, AFM76580.1)
16	+	10277−10927	216	major tail protein	major tail protein (phage vB_EcoS_Rogue1, AFM76581.1)
17	+	11002−11316	104	hypothetical protein	hypothetical protein JK_16 (phage JK06, YP_277456.1)
18	+	11379−11633	84	hypothetical protein	hypothetical protein Rogue1_0031 (phage vB_EcoS_Rogue1, AFM76583.1)
19	+	11669−14722	1017	tail tape measure protein	tail tape measure protein(phage vB_EcoS_Rogue1, AFM76584.1)
20	+	14754−15104	116	minor tail protein	minor tail protein (phagevB_EcoS_Rogue1, AFM76585.1)
21	+	15144−15911	255	minor tail protein	minor tail protein (phage vB_EcoS_Rogue1, AFM76587.1)
22	+	15979−16467	162	HNH endonuclease	HNH endonuclease (phage vB_EcoS_ACG-M12, YP_006987880.1); HNH endonuclease (phage RTP, YP_398984.1)
23	+	16469−17215	248	minor tail protein	minor tail protein (phage vB_EcoS_Rogue1, AFM76588.1)
24	+	17196−17762	188	tail assembly protein	tail fiber (phage vB_EcoS_Rogue1, AFM76598.1)
25	+	17843−21229	1128	tail fiber protein	tail fiber (phage vB_EcoS_Rogue1, AFM76590.1)
26	−	21261−22223	320	hypothetical protein	hypothetical protein Rogue1_0039 (phage vB_EcoS_Rogue1, AFM76591.1)
27	−	22223−22468	81	hypothetical lipoprotein	phage lipoprotein (phage vB_EcoS_ACG-M12, YP_006987857.1); hypothetical protein Rogue1_0040 (phage vB_EcoS_Rogue1, AFM76592.1)
28	+	22786−22932	48	hypothetical protein
29	+	23056−23766	236	phage regulatory protein	hypothetical protein Rogue1_0041 (phage vB_EcoS_Rogue1, AFM76593.1)
30	+	23919−24113	64	hypothetical protein	hypothetical protein Rogue1_0042 (phage vB_EcoS_Rogue1, AFM76594.1)
31	+	24117−25085	322	exodeoxyribonuclease VIII	putative exodeoxyribonuclease VIII (phage vB_EcoS_Rogue1, AFM76595.1)
32	+	25142−25789	215	recombination protein	putative recombination protein (phage vB_EcoS_Rogue1, AFM76596.1)
33	+	25837−26259	140	single-stranded DNA binding protein Ssb	single-stranded DNA binding protein Ssb (phage vB_EcoS_Rogue1, AFM76597.1)
34	−	26291−29008	905	tail fiber	tail fiber (phage vB_EcoS_Rogue1, AFM76598.1)
35	−	29087−30010	307	DNA primase	DNA primase (phage vB_EcoS_Rogue1, AFM76599.1)
36	−	30063−30536	157	transcriptional regulator	putative transcriptional regulator (phage vB_EcoS_Rogue1, AFM76600.1)
37	+	30629−32572	647	ATP-dependent helicase	putative ATP-dependent helicase (phage vB_EcoS_Rogue1, AFM76601.1)
38	+	32572−32961	129	hypothetical protein	hypothetical protein Rogue1_0050 (phage vB_EcoS_Rogue1, AFM76602.1)
39	+	33020−33214	64	hypothetical protein	hypothetical protein Rogue1_0051 (phage vB_EcoS_Rogue1, AFM76603.1)
40	+	33214−33432	72	hypothetical protein	hypothetical protein Rogue1_0052 (phage vB_EcoS_Rogue1, AFM76604.1)
41	+	33429−33629	66	hypothetical protein	hypothetical protein Rogue1_0053 (phage vB_EcoS_Rogue1, AFM76605.1)
42	+	33704−33829	41	hypothetical protein	hypothetical protein Rogue1_0054 (phage vB_EcoS_Rogue1, AFM76606.1); hypothetical protein ACG-M12_0057 (phage vB_EcoS_ACG-M12, YP_006987876.1)
43	+	33826−34065	79	hypothetical protein	hypothetical protein Rogue1_0055 (phage vB_EcoS_Rogue1, AFM76607.1)
44	+	34062−34319	85	hypothetical protein
45	+	34470−35606	378	hypothetical protein	hypothetical protein Rogue1_0057 (phage vB_EcoS_Rogue1, AFM76609.1); hypothetical protein rtp61 ( phage RTP, YP_399005.1); hypothetical protein ACG-M12_0060 (phage vB_EcoS_ACG-M12, YP_006987879.1)
46	+	35672−36163	163	HNH endonuclease	HNH endonuclease (phage vB_EcoS_ACG-M12, YP_006987880.1); HNH endonuclease (phage vB_EcoS_Rogue1, AFM76575.1)
47	+	36237−36422	61	hypothetical protein	hypothetical protein Rogue1_0059 (phage vB_EcoS_Rogue1, AFM76611.1)
48	+	36422−36610	62	hypothetical protein	hypothetical protein Rogue1_0060 (phage vB_EcoS_Rogue1, AFM76612.1)
49	+	36623−36796	57	hypothetical protein	hypothetical protein Rogue1_0061 (phage vB_EcoS_Rogue1, AFM76613.1); hypothetical protein ACG-M12_0064 (phage vB_EcoS_ACG-M12) ; hypothetical protein rtp62 (phage RTP, YP_399006.1)
50	+	36912−37127	71	holin	holin (phage vB_EcoS_Rogue1, AFM76614.1)
51	+	37127−37609	160	endolysin	putative endolysin (phage vB_EcoS_Rogue1, AFM76615.1)
52	+	37591−37995	134	Rz1 protein	Rz1 protein (phage vB_EcoS_Rogue1, AFM76616.1)
53	−	38009−38344	111	hypothetical protein	hypothetical protein Rogue1_0065 (phage vB_EcoS_Rogue1, AFM76617.1)
54	−	38349−39932	527	hypothetical protein	hypothetical protein Rogue1_0066 (phage vB_EcoS_Rogue1, AFM76618.1)
55	−	39973−40152	59	hypothetical protein
56	−	40235−40351	38	hypothetical protein
57	−	40430−40639	69	hypothetical protein	hypothetical protein Rogue1_0068 (phage vB_EcoS_Rogue1, AFM76620.1)
58	−	40636−40989	117	hypothetical protein	hypothetical protein Rogue1_0069 (phage vB_EcoS_Rogue1, AFM76621.1)
59	−	41015−41317	100	hypothetical protein	hypothetical protein Rogue1_0070 (phage vB_EcoS_Rogue1, AFM76622.1)
60	−	41392−41544	50	hypothetical protein	hypothetical protein Rogue1_0071 (phage vB_EcoS_Rogue1, AFM76623.1)
61	−	41545−41784	79	hypothetical protein	hypothetical protein rtp73 ( phage RTP, YP_399017.1); hypothetical protein Rogue1_0072 (phage vB_EcoS_Rogue1, AFM76624.1)
62	−	41781−41999	72	hypothetical protein	hypothetical protein JK_48 (phage JK06, YP_277488.1)
63	+	42709−43251	180	hypothetical protein	hypothetical protein Rogue1_003 (phage vB_EcoS_Rogue1, AFM76555.1)
64	+	43251−43811	186	hypothetical protein	hypothetical protein JK_46 (phage JK06, YP_277486.1)
65	+	43869−44099	76	hypothetical protein	hypothetical protein JK_45 (phage JK06, YP_277485.1)
66	+	44150−44383	77	hypothetical protein	hypothetical protein JK_44 (phage JK06, YP_277484.1)
67	+	44422−44517	31	hypothetical protein	hypothetical protein Rogue1_006 (phage vB_EcoS_Rogue1, AFM76558.1)
68	+	44502−44618	38	hypothetical protein	hypothetical protein Rogue1_007 (phage vB_EcoS_Rogue1, AFM76559.1)
69	+	44622−44921	99	hypothetical protein	hypothetical protein JK_43 (phage JK06, YP_277483.1)
70	+	44994−45122	42	hypothetical protein	hypothetical protein Rogue1_009 (phage vB_EcoS_Rogue1, AFM76561.1)
71	+	45119−45412	97	hypothetical protein	hypothetical protein Rogue1_0010 (phage vB_EcoS_Rogue1, AFM76562.1)
72	+	45416−45550	44	hypothetical protein	fusion protein (phage vB_EcoS_Rogue1, AFM76563.1)
73	+	45553−45792	79	fusion protein	fusion protein (phage vB_EcoS_Rogue1, AFM76563.1); gp63 (phage phiEB49, AEI91263.1)
74	+	45785−45979	64	hypothetical protein	hypothetical protein Rogue1_0012 (phage vB_EcoS_Rogue1, AFM76564.1)
75	+	46355−46570	71	hypothetical protein	gp62 (phage phiEB49, AEI91262.1); hypothetical protein rtp16 (phage RTP, YP_398960.1)
76	+	46599−46748	49	hypothetical protein	hypothetical protein Rogue1_0014 (phage vB_EcoS_Rogue1, AFM76566.1)
